# Supplementary material
Source: Royal Society of Chemistry journal article supplement (doi:10.1039/d5ma01489a)
Supplement: d5ma01489a1.pdf [file d5ma01489a1.pdf]

## SUPPORTING INFORMATION

### Self-Healing Pseudo-Piezoelectric Pressure Sensors from Sustainable Materials

Cephas Amoah,<sup>1</sup> Maria Jose Rojas Herrera,<sup>1</sup> William Stroebel,<sup>1</sup> W. G. Skene<sup>1,3\*</sup>

<sup>1</sup> Département de chimie, Université de Montréal, Montreal, QC, Canada

<sup>3</sup> Institut Courtois, Université de Montréal, Montreal, QC, Canada

E-mail: [w.skene@umontreal.ca](mailto:w.skene@umontreal.ca)

## Table of Contents

|                                                                                                                                                                                                                                      |   |
|--------------------------------------------------------------------------------------------------------------------------------------------------------------------------------------------------------------------------------------|---|
| Figure S1. Chemical structures of materials used in elastomers for preparing pseudo-piezoelectric pressure sensors. ....                                                                                                             | 3 |
| Figure S2. Absorption spectra of films with varying chitosan concentration and deep eutectic solvents: 1.0 wt % (black), 1.5 wt% (red), 2.0 wt% (blue) and 2.5 wt% (green). ....                                                     | 3 |
| Table S1. Young Modulus of <b>pPDS</b> -chitosan-NADES films. ....                                                                                                                                                                   | 4 |
| Table S2. Sheet resistance of <b>pPDS</b> -chitosan-NADES films. ....                                                                                                                                                                | 4 |
| Figure S3. Stress-strain curves (black) of chitosan-NADES films with 0 (A), 0.025 (B), 0.05 (C), 0.10 (D), 0.15 (E), and 0.20 wt % (F) of the conducting polymer, <b>pPDS</b> , and Young's modulus fitting of the films (red). .... | 5 |
| Figure S4. Photographs of self-healed 0.20 wt% <b>pPDS</b> -chitosan-NADES film stretched from resting position (left) to 100% elongation (right). ....                                                                              | 6 |
| Figure S5. Stress-strain curves of self-healed 0.20 wt% <b>pPDS</b> -chitosan-NADES films after self-healing times of 5 (A), 30 (B), and 60 mins (C) along with the Young's modulus fitting (red). ....                              | 6 |
| Table S3. Young's modulus of self-healed <b>pPDS</b> -chitosan-NADES films at different healing time. <sup>1</sup> ....                                                                                                              | 7 |
| Figure S6. Hysteresis measurement of 0.20 wt% <b>pPDS</b> -chitosan-NADES film at 10 (black), 20 (red), 30 (green), 40 (blue) and 50% (gold) elongation. ....                                                                        | 7 |

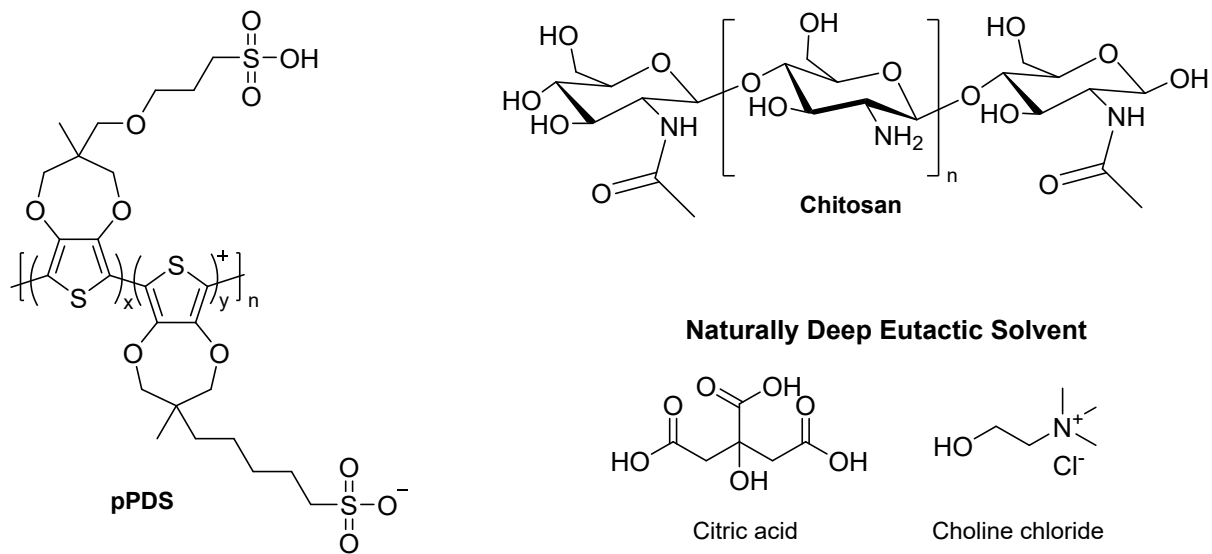

Figure S1. Chemical structures of materials used in elastomers for preparing pseudo-piezoelectric pressure sensors.

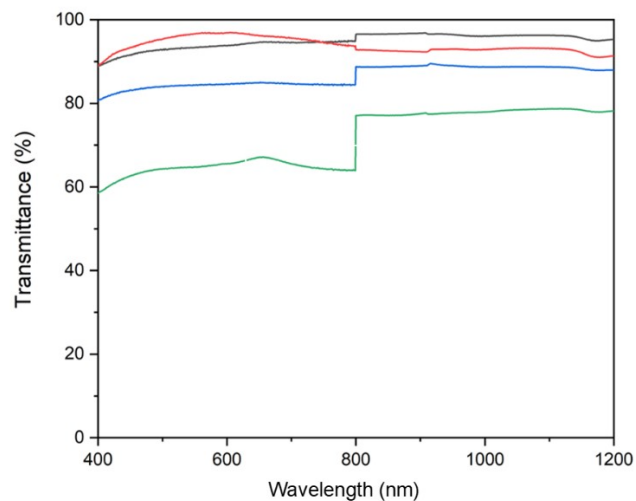

Figure S2. Absorption spectra of films with varying chitosan concentration and deep eutectic solvents: 1.0 wt % (black), 1.5 wt% (red), 2.0 wt% (blue) and 2.5 wt% (green).

Table S1. Young Modulus of **pPDS**-chitosan-NADES films.

| <b>pPDS concentration (wt%)</b> | <b>Elongation at Break (<math>E_b</math>) (<math>\pm 0.1\%</math>)</b> | <b>Young's Modulus (MPa) (<math>\pm 1.2\%</math>)</b> |
|---------------------------------|------------------------------------------------------------------------|-------------------------------------------------------|
| 0.0                             | 68.3                                                                   | 2.68                                                  |
| 0.025                           | 72.3                                                                   | 3.09                                                  |
| 0.05                            | 69.5                                                                   | 3.17                                                  |
| 0.10                            | 76.6                                                                   | 2.25                                                  |
| 0.15                            | 66.7                                                                   | 4.28                                                  |
| 0.20                            | 80.2                                                                   | 1.97                                                  |

Table S2. Sheet resistance of **pPDS**-chitosan-NADES films.

| <b>Sample (wt% of pPDS)</b> | <b>Thickness (<math>\mu\text{m}</math>) <math>\pm 0.9\%</math></b> | <b>Transverse Resistance (<math>\text{M}\Omega</math>) <math>\pm 1.2\%</math></b> |
|-----------------------------|--------------------------------------------------------------------|-----------------------------------------------------------------------------------|
| 0.0                         | 202                                                                | 15.38 <sup>a</sup>                                                                |
| 0.025                       | 253                                                                | 0.83                                                                              |
| 0.05                        | 244                                                                | 0.47                                                                              |
| 0.10                        | 211                                                                | 0.27                                                                              |
| 0.15                        | 294                                                                | 0.14                                                                              |
| 0.20                        | 297                                                                | 0.07                                                                              |

<sup>a</sup> Intrinsic ionic conductivity of the 0.0 wt% film.

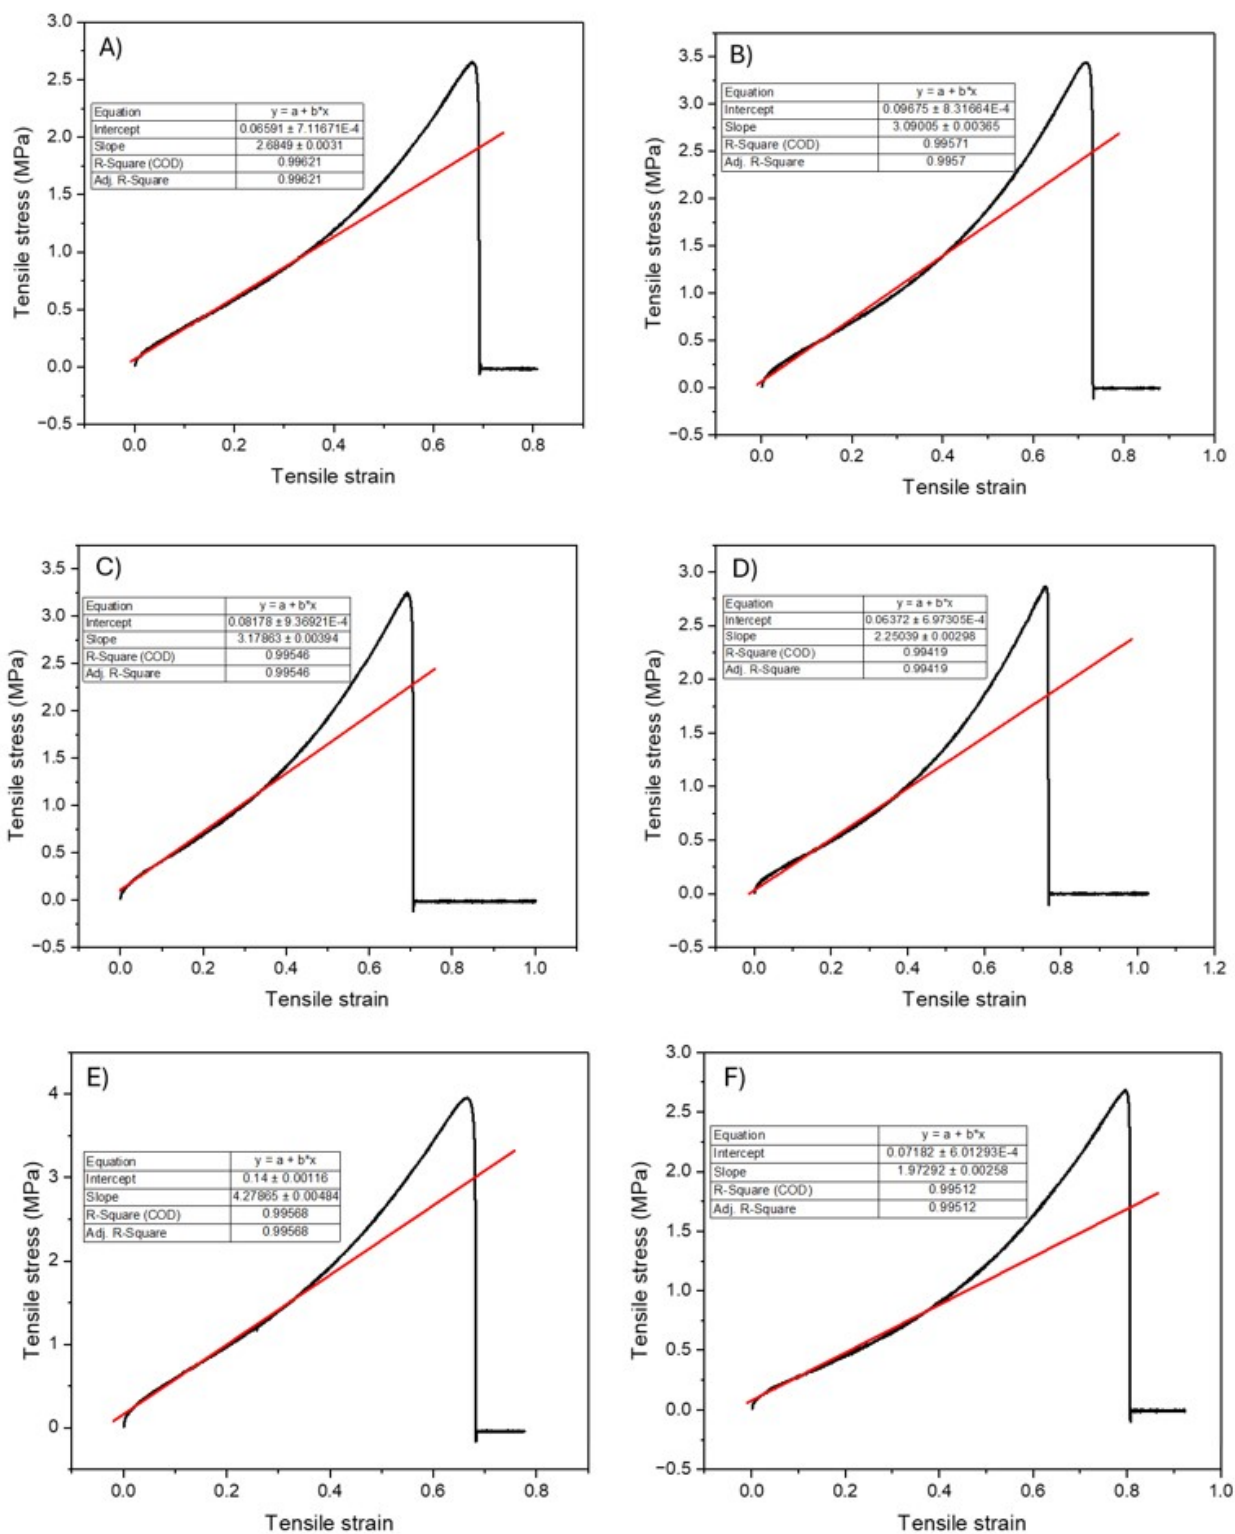

Figure S3. Stress-strain curves (black) of chitosan-NADES films with 0 (A), 0.025 (B), 0.05 (C), 0.10 (D), 0.15 (E), and 0.20 wt % (F) of the conducting polymer, **pPDS**, and Young's modulus fitting of the films (red).

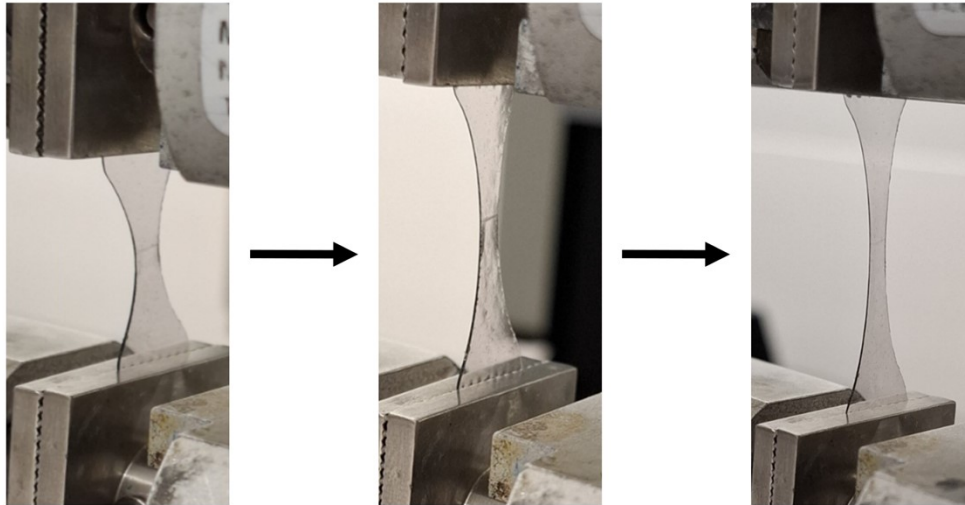

Figure S4. Photographs of self-healed 0.20 wt% **pPDS**-chitosan-NADES film stretched from resting position (left) to 100% elongation (right).

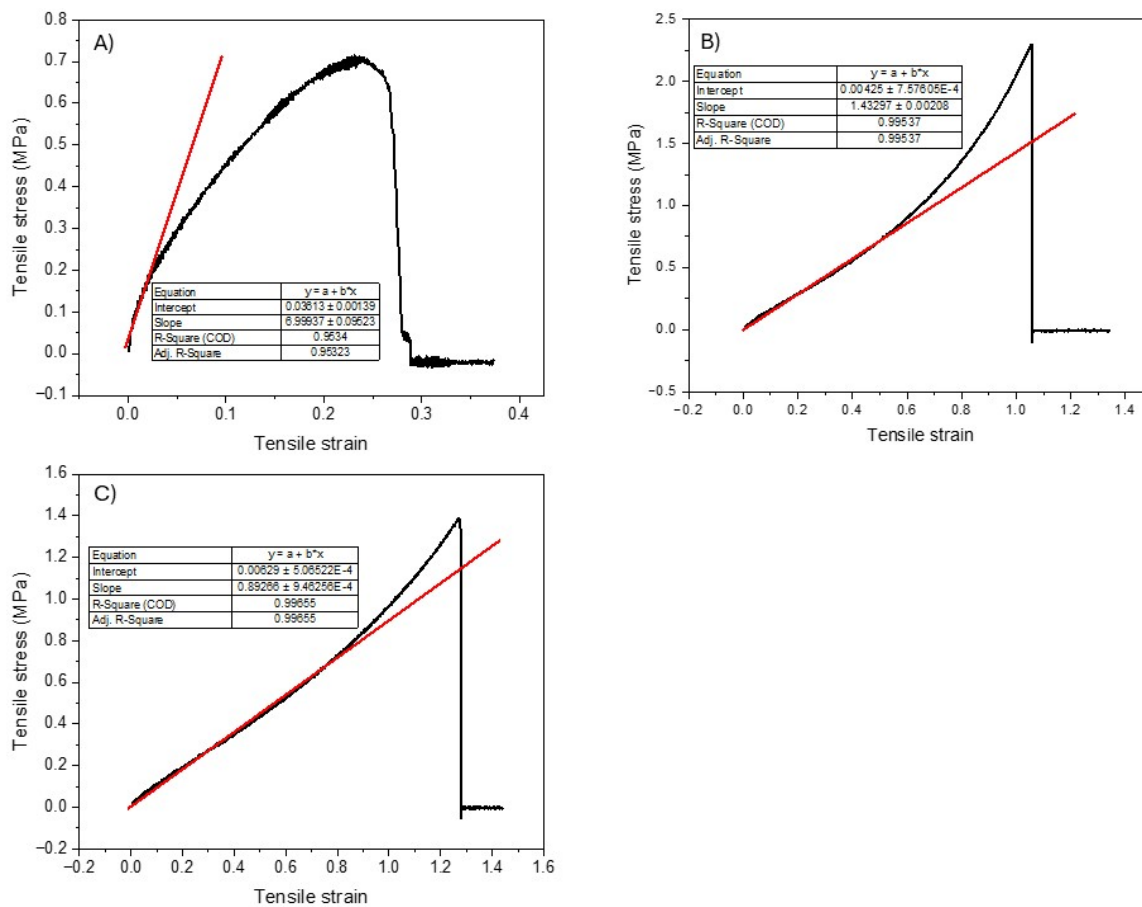

Figure S5. Stress-strain curves of self-healed 0.20 wt% **pPDS**-chitosan-NADES films after self-healing times of 5 (A), 30 (B), and 60 mins (C) along with the Young's modulus fitting (red).

Table S3. Young's modulus of self-healed **pPDS**-chitosan-NADES films at different healing time.<sup>1</sup>

| Time (h) | Elongation at Break ( $E_b$ ) ( $\pm 0.1\%$ ) | Young's Modulus (MPa) ( $\pm 1.7\%$ ) | $\sigma_{\max}$ | Relative toughness | Change in toughness | Healing amount (%) <sup>2</sup> |
|----------|-----------------------------------------------|---------------------------------------|-----------------|--------------------|---------------------|---------------------------------|
| 0        | 81%                                           | 5.46                                  | 100%            | 100%               | 0                   | 100                             |
| 5        | 51%                                           | 7.00                                  | 21%             | 14%                | -86%                | 63                              |
| 30       | 90%                                           | 1.43                                  | 56%             | 75%                | -25%                | 112                             |
| 60       | 158%                                          | 0.89                                  | 27%             | 59%                | -42%                | 195%                            |

<sup>1</sup> 0.20 wt% of **pPDS** blended in compounded mixture. <sup>2</sup> Calculated by  $\frac{\epsilon_{break(t)}}{\epsilon_{break}(t=0)} \cdot 100$

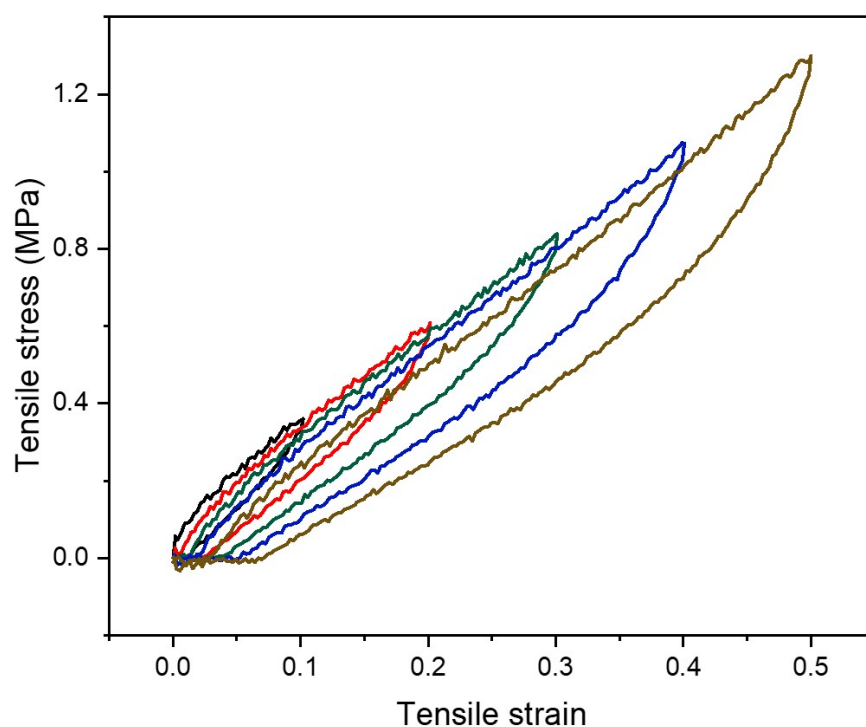

Figure S6. Hysteresis measurement of 0.20 wt% **pPDS**-chitosan-NADES film at 10 (black), 20 (red), 30 (green), 40 (blue) and 50% (gold) elongation.
